## **Multimodal neuroimaging and suicidality in a US population-based sample of school-aged children**

Pablo Vidal-Ribas, PhD<sup>1,2†</sup>; Delfina Janiri, PhD<sup>3,4†</sup>; Gaelle E. Doucet, PhD<sup>3</sup>, Narun Pornpattananangkul, PhD<sup>2,5</sup>, Dylan M. Nielson, PhD<sup>2</sup>, Sophia Frangou, MD, PhD<sup>3,6\*</sup>; Argyris Stringaris, MD, PhD, FRCPsych<sup>2\*</sup>

1. Social and Behavioral Science Branch, National Institute of Child Health and Human Development, Bethesda, USA
2. Mood Brain and Development Unit, National Institute of Mental Health, Bethesda, USA
3. Department of Psychiatry, Icahn School of Medicine at Mount Sinai, New York, USA
4. Department of Neurology and Psychiatry, Sapienza University of Rome, Rome, Italy
5. Department of Psychology, University of Otago, Dunedin, New Zealand
6. Centre for Brain Health, University of British Columbia, Vancouver, Canada

† these authors made an equal contribution to the manuscript

**Acknowledgement:** We thank Dr. Anthony Steven Dick, Associate Professor, Florida International University, for his advice in implementing and interpreting the equivalence tests. We thank Dr. Stephen E. Gilman, Chief of Social and Behavioral Science, National Institute of Child Health and Human Development, for his valuable insight and commentaries in this manuscript.

Data used in the preparation of this article were obtained from the Adolescent Brain Cognitive Development (ABCD) Study (<https://abcdstudy.org>), held in the NIMH Data Archive (NDA). This is a multisite, longitudinal study designed to recruit more than 10,000 children age 9-10 and follow them over 10 years into early adulthood. The ABCD Study is supported by the National Institutes of Health and additional federal partners under award numbers U01DA041022, U01DA041028, U01DA041048, U01DA041089, U01DA041106, U01DA041117, U01DA041120, U01DA041134, U01DA041148, U01DA041156, U01DA041174, U24DA041123, U24DA041147, U01DA041093, and U01DA041025. A full list of supporters is

available at <https://abcdstudy.org/federal-partners.html>. A listing of participating sites and a complete listing of the study investigators can be found at <https://abcdstudy.org/scientists/workgroups/>. ABCD consortium investigators designed and implemented the study and/or provided data but did not necessarily participate in analysis or writing of this report. This manuscript reflects the views of the authors and may not reflect the opinions or views of the NIH or ABCD consortium investigators.

This work was also supported by the National Institute of Mental Health Intramural Research Program Project ZIA-MH002957 (to AS).

**Declaration of Interest:** The authors declare no competing interests.

**Funding:** This work was supported by the National Institute of Mental Health under grant R01MH113619 and R01 MH116147. NP was supported by Oakley Mental Health Research Foundation.

## Abstract

**Background:** Childhood suicidality is a major public health concern with poorly defined neurobiology, especially in young people. We sought to address this gap by examining multimodal brain imaging correlates of suicidality in a US population-based sample of school-aged children from the Adolescent Brain and Cognitive Development study.

**Methods:** Unrelated 9-10-year-olds (N=7,994) were subjected to a comprehensive assessment of individual, environmental and clinical characteristics, and underwent multimodal brain imaging. Given the sample size, we tested for both differences and equivalence of means in brain measures between children with endorsed suicidality, either by self- or/and caregiver-report, and never-suicidal children.

**Results:** Passive suicidal ideation was the most prevalence expression of suicidality. Children endorsing suicidality evidenced higher levels of individual and parental psychopathology and reported higher rates of stressful life-events and family adversity. No robust associations were observed between suicidality and any neuroimaging modality.

**Conclusions:** Vulnerability to suicidality in young children does not appear to have a discrete brain signature when considering macro-scale brain measures. The longitudinal design of the ABCD will allow us to test whether such a signature may become established during adolescent development.

## Main

Suicide deaths and suicidality —defined as suicide ideation, plans and attempts - have been rising dramatically amongst young people (>50%) in the last decade, especially in those children over 11 years of age <sup>1-3</sup>, making suicide the second-leading cause of death in those aged 10-19 years <sup>2,4</sup>. Whereas risk factors for suicidality have been well-established, these have demonstrated poor predictive validity <sup>5-7</sup>. In response, studies examining neurobiological underpinnings of suicidality have been on the rise <sup>8</sup>. However, most of these studies have been conducted in adult samples and, very few, in small clinical samples of adolescents. Given the rise of suicidality and psychopathology after puberty in the general population <sup>3,9-11</sup>, there is a need to understand better the neural mechanism underlying suicide risk in younger children. In this article, we leveraged the unique resource of the Adolescent Brain and Cognitive Development (ABCD) study to examine the neural correlates of suicidality in a large population-based sample of school-aged children.

Systematic attempts to understand the underlying mechanisms of suicidal thoughts and behaviours have been made at least since the early 19<sup>th</sup> century <sup>12,13</sup>, and are still a focus of intense discussion, both overall (see, for example, <sup>6,14</sup>) and in youth specifically <sup>15-18</sup>. For example, epidemiological studies in children and adolescents have established that suicidality is associated with higher levels of distress, disruptive and impulsive behaviors, higher rates of psychiatric disorders and substance abuse, history of adverse life events, family dysfunction, poor school environment, and parental history of psychopathology and suicidal behaviors, among others <sup>15,16,19-25</sup>. Individual, environmental and clinical risk factors of youth suicidality

have been well replicated in these studies; however, the predictive value of these factors is limited due to low sensitivity<sup>5-7</sup>. In response, several studies have attempted to identify the neurobiological underpinnings of suicidal behaviour with the aim of improving and targeting suicide prevention strategies. Whereas the number of studies reporting neuroimaging correlates of suicidality has grown exponentially in the last two decades<sup>8</sup>, our understanding of the neural mechanisms underlying suicidality in young children is still poor.

In the most recent and comprehensive review of neuroimaging correlates of suicidality the authors reported some converging evidence across studies with regions involved in affective processing and impulsive regulation, including ventral and dorsal prefrontal cortex, cingulate cortex, amygdala, hippocampus, insula, thalamus, striatum, and posterior regions such as posterior cingulate cortex, lateral temporal lobes and cerebellum<sup>8</sup>. However, the authors also emphasized the modest sample sizes and heterogeneity across studies. Moreover, it is still unclear whether these findings apply to children for several reasons. First, most neuroimaging studies examining suicidality have been conducted in adult samples and sometimes yielding inconsistent findings. For example, two recent meta-analysis of brain structural imaging studies failed to find robust differences between suicidal and non-suicidal participants<sup>26,27</sup>, and aberrant functional engagement of the regions mentioned above have been reported with little inter-study consistency in terms of directionality of findings<sup>8,28-33</sup>. Second, studies in young people are too scarce to draw firm conclusions<sup>34-42</sup>. Collectively, these studies have implicated aberrant activations and connectivity in brain regions associated with affective processing<sup>34,38,40</sup> and cognitive control<sup>35,37,39</sup>. However, all these studies were conducted in small clinical samples of

adolescents with mood disorders<sup>8</sup>, which have high propensity of bias and hampers the generalizability to younger children and the general population.

If we were to find neuroimaging correlates of suicidality among school-aged children, it would be important because both suicidal behaviors and psychopathology increase dramatically after puberty<sup>9-11</sup>; thus, we could identify biomarkers of suicide vulnerability before these are more likely to occur. Conversely, the lack of differences between the groups would suggest that among school-aged children, the etiology of suicide does not have a neurobiological basis.

In the current study, we employed data from a large population-based sample from the Adolescent Brain and Cognitive Development (ABCD) study (<https://abcdstudy.org/>)<sup>43,44</sup> to examine the correlates of suicidal behaviors using a multi-informant approach. Using the baseline data from the ABCD study of children aged 9-10 years, we first examined individual, environmental and clinical correlates of suicidality typically found at this age<sup>14,16,23-25</sup>. Next, we sought to identify associations between suicidality and multiple brain imaging measures, including brain morphometry, functional connectivity at rest, and functional measures during three tasks that involved processes previously associated with suicidality in older samples; named, reward processing<sup>36,45,46</sup>, inhibitory control<sup>37,47</sup>, working memory<sup>48,49</sup> and affective processing<sup>38,40</sup>. We tested for differences in these measures using a traditional null hypothesis significance test. However, within this framework, failure to find a difference does not imply equivalence of means; or, if a difference is found, this might not be large enough to be deemed worthwhile. Therefore, in the current study we complemented our analysis approach with

Equivalence tests<sup>50</sup>, which examine the equivalence of means regardless of the presence or lack of statistically significant differences.

## Methods

### *The ABCD study*

All the data used here were accessed from the ABCD Study Curated Annual Release 2.0 and are available on request from the NIMH Data Archive (<https://data-archive.nimh.nih.gov/abcd>). The baseline ABCD sample consists of 11,875 children from 22 sites across the United States that match the demographic profile of the American Community Survey<sup>44</sup>. The University of California at San Diego Institutional Review Board was responsible for the ethical oversight of the ABCD study. The present study is based on 7,994 unrelated ABCD participants for whom complete self-report *and* caregiver data on childhood suicidality were available. As detailed below and illustrated in **Figure 1**, the neuroimaging analyses involved subsamples based on the availability of high-quality magnetic resonance imaging (MRI) data for each modality (see Supplementary information for details).

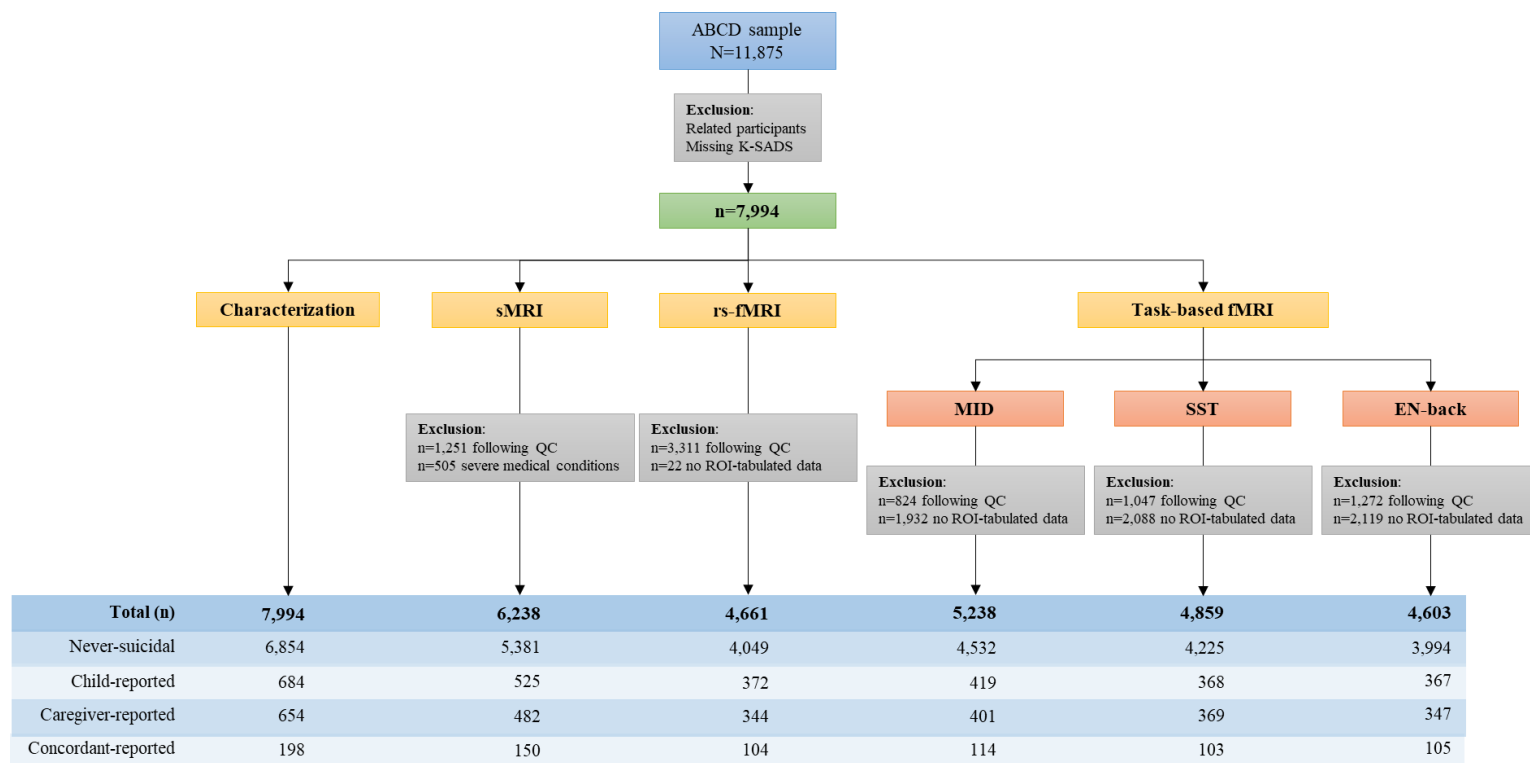

**Figure 1. Sample selection flowchart.**

### *Determination of childhood suicidality*

Suicidality in children was assessed using the child-report and the caregiver-report of the computerized Kiddie Schedule for Affective Disorders and Schizophrenia (KSADS) for DSM-5 (KSADS-5)<sup>51</sup>. The KSADS-5 assesses the following aspects of suicidality: passive suicidal ideation, active but nonspecific suicidal ideation, suicidal ideation with a specific method, active suicidal ideation with an intent, active suicidal ideation with a plan, preparatory actions toward imminent suicidal behavior, interrupted suicidal attempts, aborted suicidal attempts and suicidal attempts. Children were considered as having experienced suicidality if they or their caregiver endorsed any of the above items as present either in the past or at the time of the assessment. Items relating to self-injurious behavior without suicidal intent were not included. Based on



children and caregiver reports, four suicidality groups were computed: 1) child-reported suicidality 2) caregiver-reported suicidality, 3) concordantly-reported suicidality (i.e., both child and parent endorse at least one item), and 4) never-suicidal (i.e., both child and parent do not endorse any item).

### ***Individual and environmental characteristics***

We focused on individual and environmental (including family and school) characteristics, as well as clinical factors that have been associated with suicidality in previous studies<sup>16,19-21,23-25</sup>.

Individual and environmental factors comprised the children's sex, race/ethnicity, general intelligence, exposure to stressful life events, the presence of common medical conditions, pubertal development, family income level and economic problems, caregiver education, caregiver relationship status, family conflict, and school environment. In terms of individual clinical factors, we examined general psychopathology and psychiatric disorders in the children. Family clinical factors included general psychopathology in the caregiver, parental use of mental health services, including hospitalization, parental history of depression, parental history of suicide attempt or death, and maternal alcohol or substance use during pregnancy. Description and instruments employed to assess these variables are provided in **Supplementary Table S1**.

### ***Neuroimaging***

High-resolution T<sub>1</sub>-weighted images as well as task-based and resting-state fMRI data were obtained at each ABCD site using 3T MRI systems. For the imaging analyses conducted in this study, a number of scans were excluded because they did not meet quality assurance standards (see Supplementary information for details). To preserve statistical power given the low number

of children endorsing suicidality we analysed each modality separately rather than selecting only those children that had high-quality data across all three of the imaging modalities (**Figure 1**). A detailed description of the acquisition protocols, quality control procedures, imaging processing, and analyses of the ABCD study have been published elsewhere<sup>43,52</sup> and are summarized below.

*Brain structural imaging:* Following pre-processing, cortical reconstruction and volumetric segmentation of structural datasets was conducted using FreeSurfer image analysis suite (version 5.3.0; <http://surfer.nmr.mgh.harvard.edu/>). For each individual, we considered FreeSurfer-derived regional cortical thickness measures (n=68) and regional subcortical volume measures (n=18). Regional volumetric and cortical thickness measures were respectively adjusted for total intracranial volume and mean cortical thickness.

*Resting-state functional imaging:* During collection of rs-fMRI data, children viewed a crosshair for 20 minutes. To quantify connectivity strength during rs-fMRI, a seed-based correlational approach was applied on parcellated regions<sup>53-55</sup>. Using a functional atlas<sup>53</sup> we grouped the cortical-surface regions into 12 predefined large-scaled networks: auditory, cingulo-opercular, cingulo-parietal, default-mode, dorsal-attention, fronto-parietal, retrosplenial-temporal, salience, sensorimotor-hand, sensorimotor-mouth, ventral-attention, and visual networks. We computed functional connectivity estimates using Fisher r to z transformations of the mean correlations between pairs of regions examined. Specifically, we computed the within-network functional connectivity (n=12), the between-network functional connectivity (n=66) and the functional connectivity between each network and 19 subcortical regions (n=228).

*Task-based functional imaging:* We examined activations evoked by three tasks: a modified monetary incentive delay task (MID) <sup>56</sup>, stop signal task (SST) <sup>57</sup> and emotional n-back task (EN-back) <sup>58,59</sup>, selected to probe reward processing, inhibitory control, and working memory, respectively <sup>43</sup>, with the latter also including affective processing. The processes underlying these tasks have been implicated in suicidal behavior in clinical samples of older youth and adults <sup>36-38,46-49,60-63</sup>. For each task, task-based changes in the blood-oxygen-dependent (BOLD) signal were computed at the individual subject level using a general linear model (GLM) implemented in AFNI's 3dDeconvolve <sup>64</sup>. Average time courses were calculated for 167 regions-of-interest (ROI) derived from the Freesurfer cortical parcellation (n=148) <sup>65</sup> and subcortical segmentation (n=19) <sup>66</sup>.

The MID task started with a cue, indicating possible earnings: large reward (\$5), small reward (\$0.20), no money (\$0), small loss (\$0.20), and large loss (\$5). After a variable period following the cue, the children were shown a brief target. To either earn reward or avoid loss, children needed to respond before the target disappeared. Following the response, children saw the outcome feedback of the trial. For the MID we considered measures derived from the following contrasts: *anticipation of large reward vs neutral condition* (i.e, no gain or loss), *anticipation of large loss vs neutral condition*, *reward positive feedback vs reward negative feedback* and *loss positive feedback vs loss negative feedback*. For reward anticipation, we focused on large reward, since it has been shown to maximize this process <sup>67</sup>.

In the SST, each trial begins with the presentation of a leftward or rightward pointing arrow ("Go" stimulus), and participants are instructed to indicate the direction of the arrow, responding

“as quickly and accurately as possible”. When the arrow is followed unpredictably by a “Stop Signal” (an up-right arrow presented for 300 ms) participants are required to withhold or interrupt the motor response to the “Go” stimulus. For the SST we considered measures derived from the following contrasts that are relevant to inhibitory control: *incorrect stop vs correct go* and *correct stop vs correct go*.

For the EN-back task, depending on the condition, children needed to respond whether the stimulus was the same as (1) the one shown 2 trials earlier (2-back) or (2) the target stimulus shown at the beginning (0-back). Stimuli included houses and emotional (happy or fearful) and non-emotional faces. For the EN-back task we considered measures derived from the *2-back vs 0-back* (i.e., sensorimotor control) contrast regardless of stimulus valence as an index of working memory and measures derived from the contrast *emotional vs neutral faces* as an index of emotional valence processing independent of working-memory.

Prior to statistical analysis, the structural and resting-state imaging variables were adjusted for site/scanner effect using ComBat in R (<https://github.com/Jfortin1/ComBatHarmonization>)<sup>68,69</sup>. Initially used for batch adjustment of genetic data, ComBat uses Empirical Bayes to adjust for between-site variability while preserving biological variability. We did not apply the ComBat method on the task-based fMRI data because using within-individual contrasts alone in the ABCD task-based fMRI data can mitigate scanner-related variance<sup>69</sup>. Finally, for each conducted test with resting-state and task-based fMRI measures, we calculated the interquartile range (IQR) in order to remove outlier values that were above 1.5\*IQR.

## Statistical analysis

### *Analysis of individual and environmental characteristics*

Group differences between never-suicidal children and those endorsing suicidality in continuous variables were tested with Welch's t-tests<sup>70</sup>, to allow for unequal sample sizes. Difference in rates of categorical variables were examined with chi-squared tests. Results were considered significant at  $p < 0.05$  with False Discovery Rate (FDR) correction for multiple comparisons.

### *Analysis of neuroimaging data*

The association between suicidality and imaging measures was examined using two complementary approaches. We examined *differences* between groups endorsing suicidality and the never-suicidal group with two-independent sample t-tests; we used Welch's t-tests to account for unequal number of observations. Of note, Welch's t-test is a traditional null hypothesis significance test, in which the null hypothesis is that the true effect size of the mean difference between groups is zero. Whereas with this test one can conclude that the effect is statistically different from zero if the null hypothesis is rejected, the absence of effect cannot be statistically supported. That is, after performing the test, if the  $p$ -value is larger than the prespecified threshold (e.g., 0.05), it is not possible to conclude that there is no effect or that the effect equals zero. It might simply be that the study had not power enough to detect differences. Moreover, regardless of whether a statistically significant effect is found or not, one might want to examine whether such an effect is large enough to be deemed worthwhile. In these cases, one can examine whether mean differences can be considered equivalent. For these reasons, and given the size of the current study, we examine *equivalence* performing Welch's Equivalence tests (hereafter,

Equivalence test). Equivalence testing has been successfully used in prior studies using the ABCD cohort<sup>71</sup> as a safeguard against Type II errors (i.e., false negative results) and against overinterpreting positive results that may arise in large samples despite group differences being minimal (i.e., statistical overpowering)<sup>72</sup>. In equivalence testing, the observed data are statistically compared against *a priori* specified equivalence interval ( $\delta$ ), defined by upper ( $\Delta_U$ ) and lower ( $-\Delta_L$ ) equivalence bounds. The aim of equivalence testing is to reject the null hypothesis that the observed effect size is outside the equivalence bounds. Here, we used the “two one-sided tests” (TOST) procedure<sup>50,73</sup> implemented with the *TOSTtwo* function from the library *TOSTER* in R. The upper ( $\Delta_U$ ) and lower ( $-\Delta_L$ ) equivalence bounds were specified as 0.15 and -0.15, which correspond to traditional notions of a “small” effect size<sup>74</sup>. Since null-hypothesis significant tests, such as Welch’s t-test, and equivalence tests examine two different hypotheses, it is recommended to use both simultaneously<sup>75</sup>.

In the Welch’s t-test, the null hypothesis is rejected when the confidence interval (CI) around the effect size of the mean difference does not include zero; in this case, one can conclude difference of means. In contrast, in the Equivalence test, the null hypothesis is rejected when the CI around the effect size of the mean difference does not include the prespecified lower and upper bounds; in this case, one can conclude equivalence of means. Therefore, when both null hypothesis significance tests and equivalence tests are performed, there are four possible outcomes: 1) the effect can be not statistically different from zero and statistically equivalent, 2) statistically different from zero and statistically equivalent, 3) not statistically different from zero and not statistically equivalent (i.e., undetermined), and 4) statistically different from zero and not statistically equivalent. We provide results for each of these outcomes. The threshold for

statistical significance for both tests was set at  $p < 0.05$  after applying FDR-correction for multiple comparisons.

## Results

### *Sample*

The four suicidality groups were composed as follows: child-reported suicidality (n=684, 8.6%), caregiver-reported suicidality (n=654, 8.2%), concordantly-reported suicidality (n=198, 2.5%), and never-suicidal (n=6,854, 85.7%). Among the participants with endorsed suicidality, either by the child or the caregiver (n=1,140, 14.3%), there was an agreement of 17.4% (n=198). **Table 1** shows the rate of suicidal behaviors reported by either the children or the caregivers and the rate of positive agreement for each item. There was a predominance of passive and unspecific suicidal ideation over active ideation, plans and suicidal attempts. Specifically, in the child-reported suicidality group, 42% of participants only endorsed passive suicidal ideation, and 62% of participants only endorsed passive or active nonspecific suicidal ideation. In the caregiver-reported suicidality group, these rates were 49% and 80%, respectively. Overall, in the child-reported suicidality group, suicidal ideation was endorsed by 8.4% of participants, plans were endorsed by 0.9% of participants and attempts were endorsed by 1.3% of participants. In the caregiver-suicidality group, these rates were 8.1%, 0.6%, 0.5% respectively.

| <b>Table 1. Suicidal ideation, plans and attempts in unrelated ABCD participants (N=7994)</b>                                          |                                   |                                       |                    |
|----------------------------------------------------------------------------------------------------------------------------------------|-----------------------------------|---------------------------------------|--------------------|
| <b>KSADS-5 Items</b>                                                                                                                   | <b>Child-reported suicidality</b> | <b>Caregiver-reported suicidality</b> | <b>Agreement</b>   |
| <b>Past</b>                                                                                                                            | n (%)                             | n (%)                                 | n (%) <sup>a</sup> |
| Passive suicidal ideation                                                                                                              | 469 (5.9)                         | 550 (6.9)                             | 123 (13.7)         |
| Active but nonspecific suicidal ideation                                                                                               | 294 (3.7)                         | 270 (3.8)                             | 54 (10.6)          |
| Suicidal ideation with a specific method                                                                                               | 75 (0.9)                          | 70 (0.9)                              | 5 (3.6)            |
| Active suicidal ideation with an intent                                                                                                | 47 (0.6)                          | 30 (0.4)                              | 2 (2.7)            |
| Active suicidal ideation with a plan                                                                                                   | 29 (0.4)                          | 10 (0.1)                              | 0 (0.0)            |
| Preparatory actions toward imminent suicidal behavior                                                                                  | 34 (0.4)                          | 38 (0.5)                              | 0 (0.0)            |
| Interrupted suicidal attempts                                                                                                          | 10 (0.1)                          | 5 (0.1)                               | 0 (0.0)            |
| Aborted suicidal attempts                                                                                                              | 24 (0.3)                          | 8 (0.1)                               | 0 (0.0)            |
| Suicidal attempts                                                                                                                      | 59 (0.7)                          | 23 (0.3)                              | 9 (12.3)           |
| <b>Current</b>                                                                                                                         |                                   |                                       |                    |
| Passive suicidal ideation                                                                                                              | 98 (1.2)                          | 48 (0.6)                              | 6 (4.3)            |
| Active but nonspecific suicidal ideation                                                                                               | 126 (1.6)                         | 93 (1.2)                              | 10 (4.8)           |
| Suicidal ideation with a specific method                                                                                               | 47 (0.6)                          | 14 (0.2)                              | 1 (1.7)            |
| Active suicidal ideation with an intent                                                                                                | 25 (0.3)                          | 7 (0.1)                               | 1 (3.2)            |
| Active suicidal ideation with a plan                                                                                                   | 20 (0.3)                          | 3 (0.0)                               | 0 (0.0)            |
| Preparatory actions towards imminent suicidal behavior                                                                                 | 17 (0.2)                          | 6 (0.1)                               | 0 (0.0)            |
| Interrupted suicidal attempts                                                                                                          | 4 (0.1)                           | 0 (0.0)                               | 0 (0.0)            |
| Aborted suicidal attempts                                                                                                              | 16 (0.2)                          | 1 (0.0)                               | 0 (0.0)            |
| Suicidal attempts                                                                                                                      | 15 (0.2)                          | 5 (0.1)                               | 1 (5.3)            |
| <b>Total (any endorsement)</b>                                                                                                         | <b>684 (8.6)</b>                  | <b>654 (8.2)</b>                      | <b>198 (17.4)</b>  |
| Child or caregivers could have endorsed more than one item; KSADS-5=Kiddie Schedule for Affective Disorders and Schizophrenia for DSM5 |                                   |                                       |                    |
| <sup>a</sup> Percentage of positive agreement between children and caregivers that endorsed the item                                   |                                   |                                       |                    |

### *Individual and environmental characteristics*

**Table 2** shows the descriptive statistics and comparison of individual and environmental characteristics between the suicidality groups. Several variables differed at  $p_{FDR} < 0.05$  between the three suicidality groups and the never-suicidal group. Specifically, all suicidality groups presented higher rate of males, higher exposure to stressful life events, more economic problems in the last 12 months, more family conflict, less positive school environment and higher rates and scores in every individual and parental clinical variable examined, including general



psychopathology, psychiatric disorders in the child, parental use of mental health services, parental hospitalization due to mental health problems, maternal alcohol and/or substance use during pregnancy, and parental history of depression and suicide attempt or death.

In addition, compared to the never-suicidal group, child- and parent-reported suicidality groups presented higher rates of participants with multiple races, females with more advanced pubertal development, and lower rates of caregiver living with partner. Finally, compared to the never-suicidal group, parent- and concordantly-reported suicidality groups had caregivers with higher education.

| <b>Table 2. Individual, environmental and clinical characteristics of the suicidality groups by informant</b>                                                                                                                                                                                                                                                                                                                      |                                             |                                                 |                                                    |                                  |
|------------------------------------------------------------------------------------------------------------------------------------------------------------------------------------------------------------------------------------------------------------------------------------------------------------------------------------------------------------------------------------------------------------------------------------|---------------------------------------------|-------------------------------------------------|----------------------------------------------------|----------------------------------|
|                                                                                                                                                                                                                                                                                                                                                                                                                                    | <b>Child-reported Suicidality<br/>N=684</b> | <b>Caregiver-reported Suicidality<br/>N=654</b> | <b>Concordantly-reported Suicidality<br/>N=198</b> | <b>Never-Suicidal<br/>N=6854</b> |
| <b>Individual characteristics</b>                                                                                                                                                                                                                                                                                                                                                                                                  |                                             |                                                 |                                                    |                                  |
| Sex (% male)                                                                                                                                                                                                                                                                                                                                                                                                                       | 59.6%*                                      | 64.4%*                                          | 66.2%*                                             | 51.6%                            |
| Race (%)                                                                                                                                                                                                                                                                                                                                                                                                                           |                                             |                                                 |                                                    |                                  |
| White                                                                                                                                                                                                                                                                                                                                                                                                                              | 59.4%                                       | 63.1%                                           | 62.8%                                              | 62.9%                            |
| Black/African American                                                                                                                                                                                                                                                                                                                                                                                                             | 17.7%                                       | 12.3%*                                          | 13.3%                                              | 16.5%                            |
| Asian                                                                                                                                                                                                                                                                                                                                                                                                                              | 2.8%                                        | 2.1%                                            | 2.6%                                               | 2.1%                             |
| Multiple races                                                                                                                                                                                                                                                                                                                                                                                                                     | 15.5%*                                      | 15.9%*                                          | 14.8%                                              | 12.1%                            |
| Other races                                                                                                                                                                                                                                                                                                                                                                                                                        | 4.6%                                        | 6.5%                                            | 6.6%                                               | 6.3%                             |
| Ethnicity (%)                                                                                                                                                                                                                                                                                                                                                                                                                      |                                             |                                                 |                                                    |                                  |
| Hispanic/Latino                                                                                                                                                                                                                                                                                                                                                                                                                    | 21.0%                                       | 21.1%                                           | 21.1%                                              | 23.1%                            |
| Total intelligence composite, mean (sd)                                                                                                                                                                                                                                                                                                                                                                                            | 100.7 (18.4)                                | 99.9 (18.1)                                     | 100.3 (17.6)                                       | 101.0 (18.4)                     |
| Exposure to stressful events (%)                                                                                                                                                                                                                                                                                                                                                                                                   | 42.8%*                                      | 50.9%*                                          | 50.8%*                                             | 35.2%                            |
| Had a common childhood medical condition (%)                                                                                                                                                                                                                                                                                                                                                                                       | 45.5%                                       | 50.2%*                                          | 49.0%                                              | 42.3%                            |
| Pubertal development (Caregiver report), mean (sd)                                                                                                                                                                                                                                                                                                                                                                                 |                                             |                                                 |                                                    |                                  |
| Females                                                                                                                                                                                                                                                                                                                                                                                                                            | 2.3 (0.9)*                                  | 2.4 (0.9)*                                      | 2.3 (0.8)                                          | 2.2 (0.9)                        |
| Males                                                                                                                                                                                                                                                                                                                                                                                                                              | 1.3 (0.6)                                   | 1.4 (0.6)                                       | 1.4 (0.6)                                          | 1.4 (0.6)                        |
| Pubertal development (Child report), mean (sd)                                                                                                                                                                                                                                                                                                                                                                                     |                                             |                                                 |                                                    |                                  |
| Females                                                                                                                                                                                                                                                                                                                                                                                                                            | 2.5 (0.8)*                                  | 2.4 (0.8)*                                      | 2.5 (0.8)                                          | 2.3 (0.9)                        |
| Males                                                                                                                                                                                                                                                                                                                                                                                                                              | 2.1 (0.7)*                                  | 2.0 (0.7)                                       | 2.1 (0.6)                                          | 1.9 (0.8)                        |
| <b>Environmental, family and school characteristics</b>                                                                                                                                                                                                                                                                                                                                                                            |                                             |                                                 |                                                    |                                  |
| Income level mean (sd)                                                                                                                                                                                                                                                                                                                                                                                                             | 7.0 (2.4)                                   | 7.0 (2.4)                                       | 7.2 (2.2)                                          | 7.1 (2.5)                        |
| Economic problems in the last year (%)                                                                                                                                                                                                                                                                                                                                                                                             | 29.0%*                                      | 32.2%*                                          | 33.8%*                                             | 21.4%                            |
| Level of highest education achieved by primary caregiver, mean (sd)                                                                                                                                                                                                                                                                                                                                                                | 16.5 (2.7)                                  | 16.8 (2.5)*                                     | 17.0 (2.3)*                                        | 16.6 (2.9)                       |
| Primary caregiver living with partner (%)                                                                                                                                                                                                                                                                                                                                                                                          | 69.3%*                                      | 67.8%*                                          | 67.4%                                              | 73.5%                            |
| Family conflict (Caregiver report), mean (sd)                                                                                                                                                                                                                                                                                                                                                                                      | 2.8 (2.1)*                                  | 3.4 (2.2)*                                      | 3.3 (2.2)*                                         | 2.4 (1.9)                        |
| Family conflict (Child report), mean (sd)                                                                                                                                                                                                                                                                                                                                                                                          | 2.8 (2.2)*                                  | 2.6 (2.1)*                                      | 3.1 (2.3)*                                         | 1.9 (1.9)                        |
| Positive school environment, mean (sd)                                                                                                                                                                                                                                                                                                                                                                                             | 18.8 (3.3)*                                 | 19.0 (3.4)*                                     | 18.3 (3.4)*                                        | 20.0 (2.8)                       |
| <b>Individual clinical characteristics</b>                                                                                                                                                                                                                                                                                                                                                                                         |                                             |                                                 |                                                    |                                  |
| General psychopathology (CBCL), mean (sd) T-scores                                                                                                                                                                                                                                                                                                                                                                                 | 52.0 (11.6)*                                | 57.8 (11.1)*                                    | 59.7 (10.7)*                                       | 45.3 (10.8)                      |
| Current Psychiatric disorders (Caregiver report) (%)                                                                                                                                                                                                                                                                                                                                                                               |                                             |                                                 |                                                    |                                  |
| Any depressive disorder                                                                                                                                                                                                                                                                                                                                                                                                            | 1.3%*                                       | 1.8%*                                           | 3.5%*                                              | 0.2%                             |
| Any anxiety disorder                                                                                                                                                                                                                                                                                                                                                                                                               | 17.5%*                                      | 25.8%*                                          | 31.3%*                                             | 10.2%                            |
| ADHD                                                                                                                                                                                                                                                                                                                                                                                                                               | 17.1%*                                      | 27.5%*                                          | 29.8%*                                             | 9.5%                             |
| ODD                                                                                                                                                                                                                                                                                                                                                                                                                                | 10.3%*                                      | 18.8%*                                          | 20.7%*                                             | 4.3%                             |
| CD                                                                                                                                                                                                                                                                                                                                                                                                                                 | 5.9%*                                       | 13.0%*                                          | 12.6%*                                             | 2.1%                             |
| PTSD                                                                                                                                                                                                                                                                                                                                                                                                                               | 1.8%*                                       | 4.6%*                                           | 5.1%*                                              | 0.4%                             |
| <b>Family clinical characteristics</b>                                                                                                                                                                                                                                                                                                                                                                                             |                                             |                                                 |                                                    |                                  |
| General psychopathology (ASR), mean (sd) T-scores                                                                                                                                                                                                                                                                                                                                                                                  | 46.1 (10.6)*                                | 49.2 (10.4)*                                    | 49.9 (10.4)*                                       | 42.5 (10.1)                      |
| Maternal mental health service use (%)                                                                                                                                                                                                                                                                                                                                                                                             | 40.9%*                                      | 53.0%*                                          | 58.7%*                                             | 30.1%                            |
| Paternal mental health service use (%)                                                                                                                                                                                                                                                                                                                                                                                             | 24.6%*                                      | 30.7%*                                          | 33.2%*                                             | 20.2%                            |
| Maternal mental health hospitalization (%)                                                                                                                                                                                                                                                                                                                                                                                         | 9.0%*                                       | 12.8%*                                          | 15.9%*                                             | 4.5%                             |
| Paternal mental health hospitalization (%)                                                                                                                                                                                                                                                                                                                                                                                         | 6.8%*                                       | 8.4%*                                           | 10.4%*                                             | 4.0%                             |
| Maternal history of depression (%)                                                                                                                                                                                                                                                                                                                                                                                                 | 32.4%*                                      | 43.2%*                                          | 49.7%*                                             | 22.6%                            |
| Paternal history of depression (%)                                                                                                                                                                                                                                                                                                                                                                                                 | 20.8%*                                      | 25.5%                                           | 30.3%*                                             | 13.2%                            |
| Maternal history of suicide attempt/death (%)                                                                                                                                                                                                                                                                                                                                                                                      | 6.8%*                                       | 10.0%*                                          | 11.5%*                                             | 2.9%                             |
| Paternal history of suicide attempt/death (%)                                                                                                                                                                                                                                                                                                                                                                                      | 4.8%*                                       | 5.8%*                                           | 8.7%*                                              | 2.1%                             |
| Maternal alcohol/substance use during pregnancy (%)                                                                                                                                                                                                                                                                                                                                                                                | 13.0%*                                      | 13.5%*                                          | 14.1%*                                             | 8.2%                             |
| * Denotes group differences at $p_{FDR} < 0.05$ between the never-suicidal group and each of the groups endorsing suicidality. ADHD, Attention-deficit/hyperactivity disorder; ASR, Adult Self-Report; CBCL, Child Behavior Checklist; CD, Conduct disorder; ODD, Oppositional defiant disorder; PTSD, Posttraumatic stress disorder; sd, standard deviation. Definitions of each variable can be found in Supplementary Table S1. |                                             |                                                 |                                                    |                                  |

## *Neuroimaging results*

**Figure 1** shows the sample size of the groups for each imaging modality analyzed. For each modality, we first provide the combined results of applying traditional null-hypothesis Welch's t-tests and Equivalence test, after applying FDR-correction for multiple comparisons. These results are depicted in **Figure 2**. Of note, none of the outcomes for any imaging modality was statistically different and statistically equivalent, neither after FDR-correction nor at uncorrected level. That is, any effects found were considered strong enough to be deemed worthwhile.

The results at uncorrected level are summarized in **Supplementary Table S32**, along with brain measures that showed to be statistically different and not statistically equivalent across two or more group comparisons.

*Brain structural imaging:* Among the 86 regions examined, only one showed to be statistically different and not statistically equivalent after applying FDR-correction; specifically, the left bank of the superior temporal sulcus was significantly thinner in the caregiver-reported suicidality group than in the never-suicidal group (**Figures 2-3, Supplementary Tables S2-S4**). The number of regions that showed to be not statistically different and statistically equivalent were 62 (72.1%) for the child-reported suicidality comparison, 76 (88.4%) for the caregiver-reported suicidality comparison and 0 for the concordantly-reported suicidality comparison. No evidence of both difference and equivalence (undetermined), was found for 24 (27.9%), 9 (10.5%), and 86 (100%) regions for child-, caregiver-, and concordantly-reported suicidality comparisons, respectively (**Figure 2, Supplementary Figures S1-S6**).

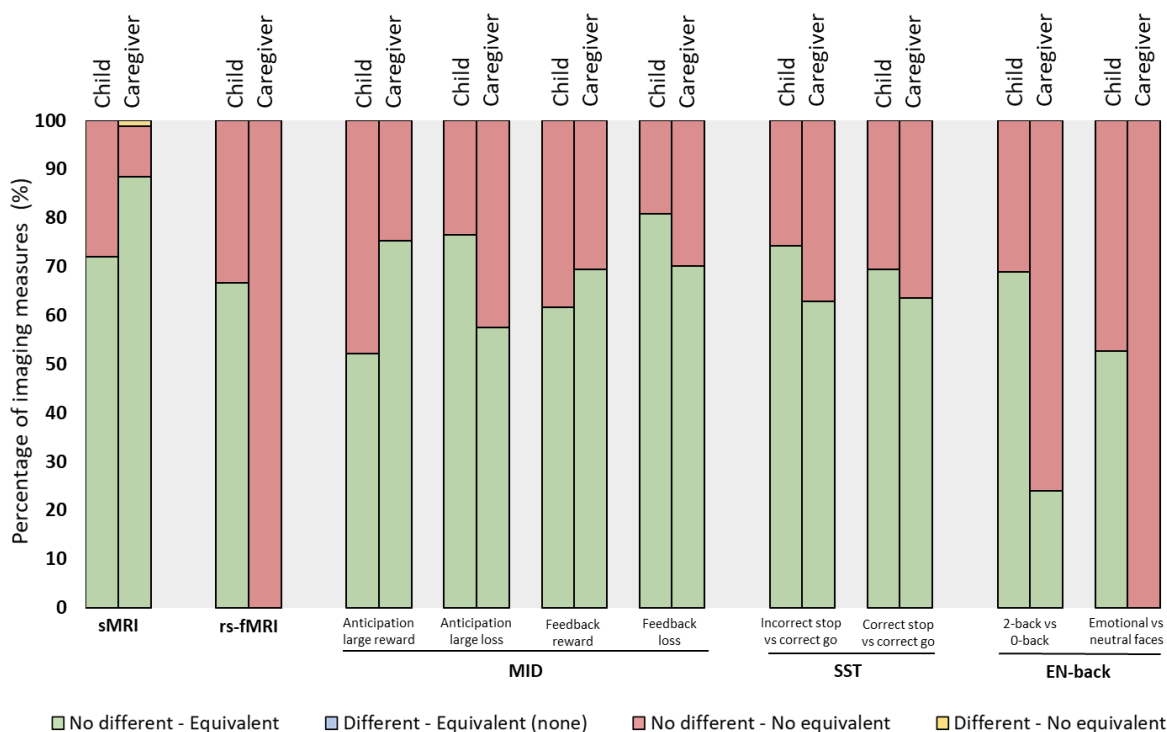

**Figure 2. Percentage of outcomes of the Welch’s t-test and Equivalence test for each imaging modality by suicidality group comparison.** For each informant, structural MRI examined 86 regions, resting-state fMRI examined 306 connectivity indices, and task-based fMRI examined activations in 167 regions. No evidence of difference (Welch’s t-test,  $p_{FDR} \geq 0.05$ , 95% confidence interval (CI) includes zero), Evidence of difference (Welch’s t-test,  $p_{FDR} < 0.05$ , 95% CI does not include zero). Evidence of equivalence (Equivalence test,  $p_{FDR} < 0.05$ , 90% CI does not overlap with bounds); No evidence of equivalence (Equivalence test,  $p_{FDR} \geq 0.05$ , 90% CI overlaps with bound/s). sMRI, structural MRI. rs-fMRI, resting-state fMRI. MID, Monetary incentive delay task. SST, Stop signal task. EN-back, Emotional n-back task.

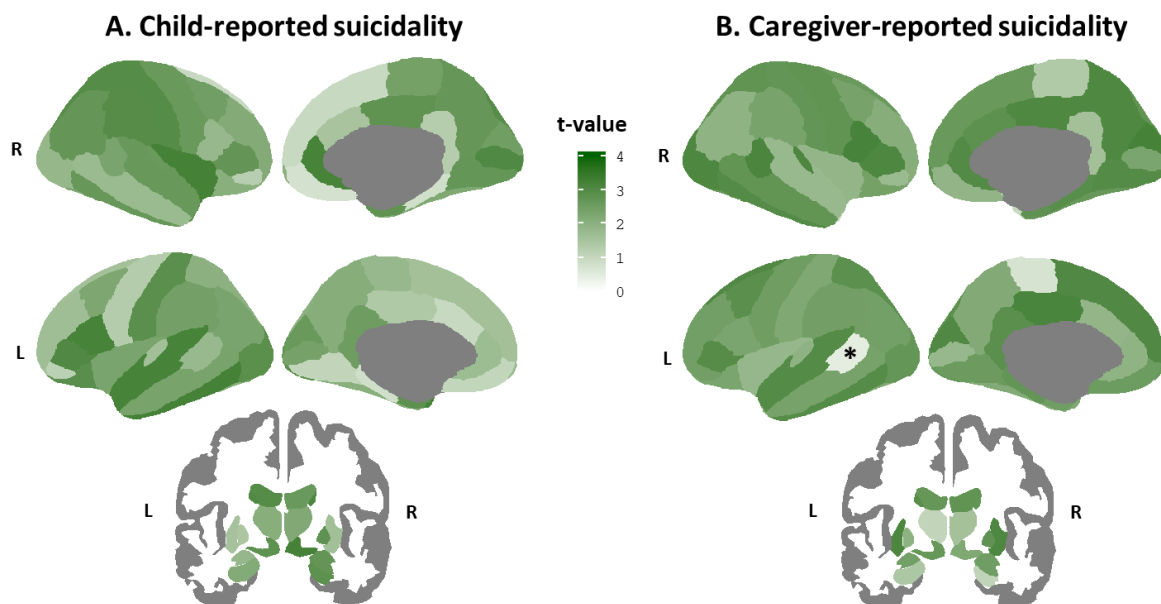

**Figure 3. Equivalence testing for mean differences in brain cortical thickness and subcortical volumes relating to suicidality.** Distribution of t-values from Equivalence tests comparing the regional means between the never-suicidal group (n=5,381) and the child-reported suicidality group (n=525) (Panel A) and the caregiver-reported suicidality group (n=482) (Panel B); Higher t-values (i.e., darker green) suggest equivalence between groups. \*Only the left bank of the temporal sulcus in the caregiver-reported suicidality analysis showed to be statistically different and not statistically equivalent after FDR-correction.

*Resting-state functional imaging:* Among the 306 functional connectivity measures, none showed to be statistically different and not statistically equivalent after applying FDR-correction (Figure 2, Supplementary Tables S2-S4). The number of functional connectivity measures that showed to be not statistically different and statistically equivalent were 204 (66.7%) for the child-reported suicidality comparison, 0 for the caregiver-reported suicidality comparison and 0 for the concordantly-reported suicidality comparison. No evidence of both difference and equivalence (undetermined), was found for 102 (27.9%), 306 (100%), and 306 (100%) functional connectivity measures for child-, caregiver-, and concordantly-reported suicidality comparisons, respectively (Figure 4, Supplementary Figures S7-S9).

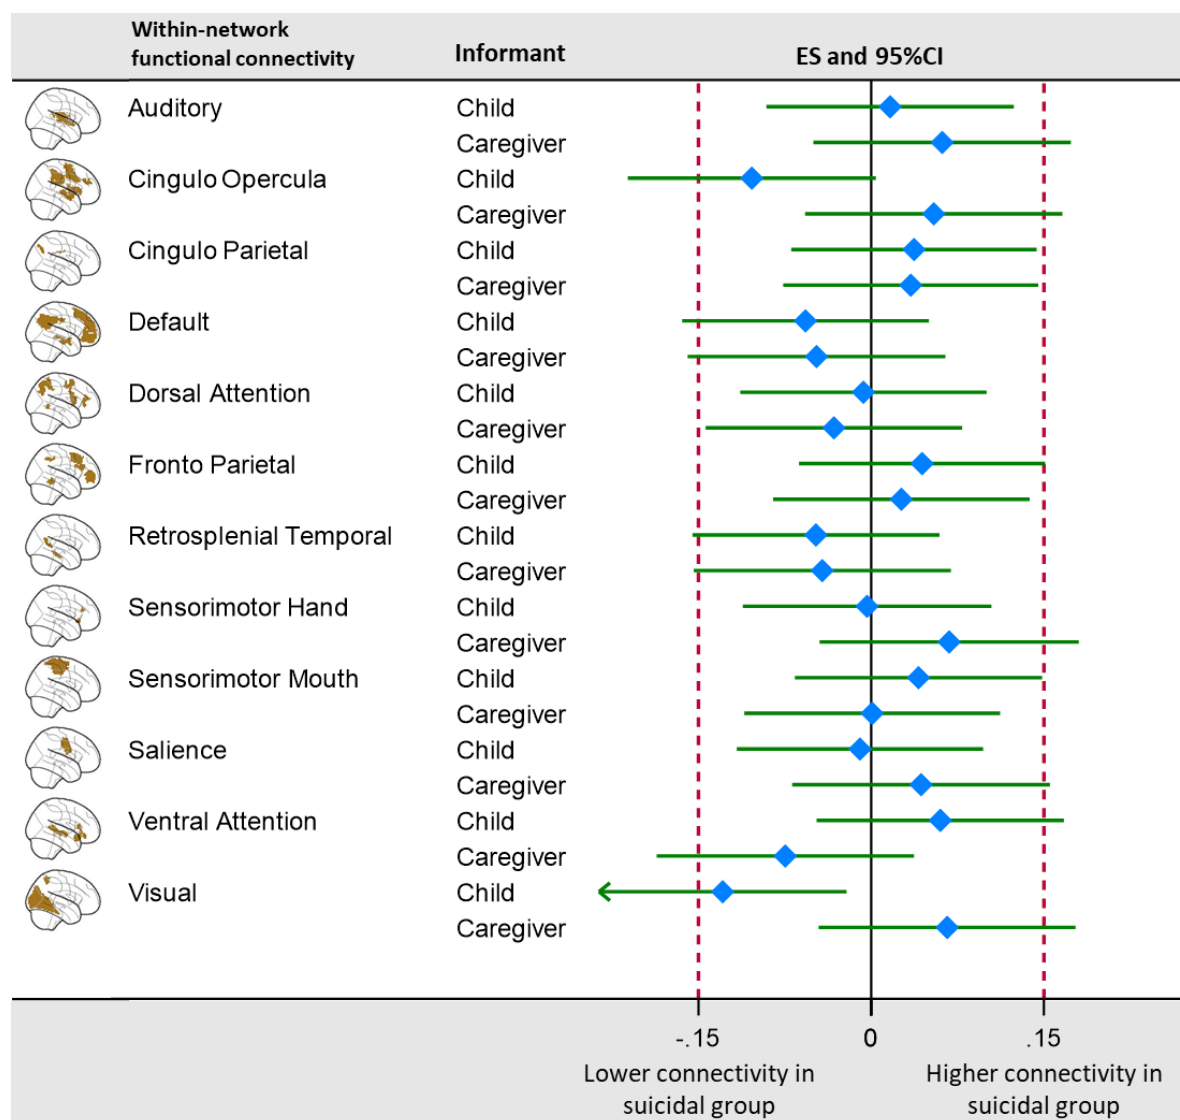

**Figure 4. Equivalence testing for mean differences in within-network functional connectivity relating to suicidality.** The figure shows the effect sizes (ES: blue diamond) and 95% confidence intervals (CI: green horizontal bars) of the difference against the interval of equivalence, -0.15 to 0.15 (red-dashed vertical lines). No statistical differences were found after applying FDR-correction for multiple comparisons.

*Task-based functional imaging:* Results of Welch's t-test and Equivalence tests for each of the tasks and contrasts examined are shown in **Figure 2, Figures 5-6, Supplementary Tables S8-S31, and Supplementary Figures S10-S57**. Briefly, among the 167 ROI mean activations

examined for each of the 3 tasks and 8 contrasts, none showed to be statistically different and not statistically equivalent after applying FDR-correction. The number of ROI mean activations that showed to be not statistically different and statistically equivalent ranged 87-135 (52.1%-80.8%) for the child-reported suicidality comparison, 0-126 (0%-75.4%) for the caregiver-reported suicidality comparison and were none for the concordantly-reported suicidality comparison (**Figure 2, Figures 5-6**). No evidence of both difference and equivalence (undetermined), was found for 32-80 (19.2%-47.9%), 41-167 (24.6%-100%), and 167 (100%) of ROI mean activations for child-, caregiver-, and concordantly-reported suicidality comparisons, respectively. The MID task showed the higher rates of ROI activations statistically equivalent, followed by the SST, and EN-back (**Figure 2, Figures 5-6**).



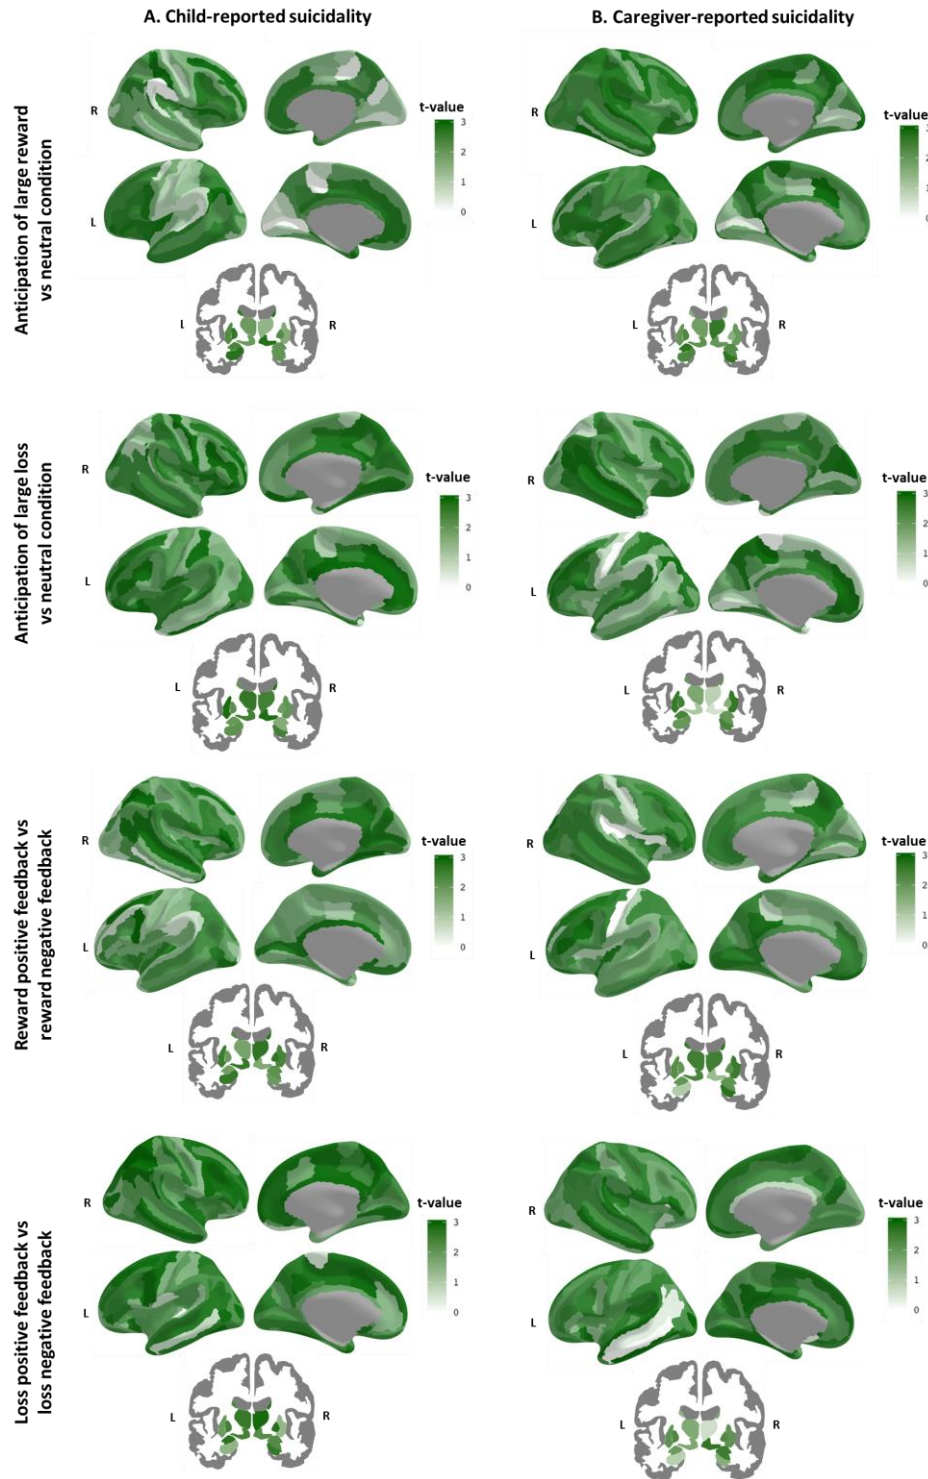

**Figure 5. Equivalence testing for mean differences in functional activation during the MID task relating to suicidality.** Distribution of absolute t-values from Equivalence tests comparing the regional means between the never-suicidal group (n=4,532) and the child-reported suicidality group (n=419) (Panel A) and the caregiver-reported suicidality group (n=401) (Panel B); Higher t-values (i.e., darker green) suggest equivalence between groups. No statistical differences were found after applying FDR-correction for multiple comparisons.



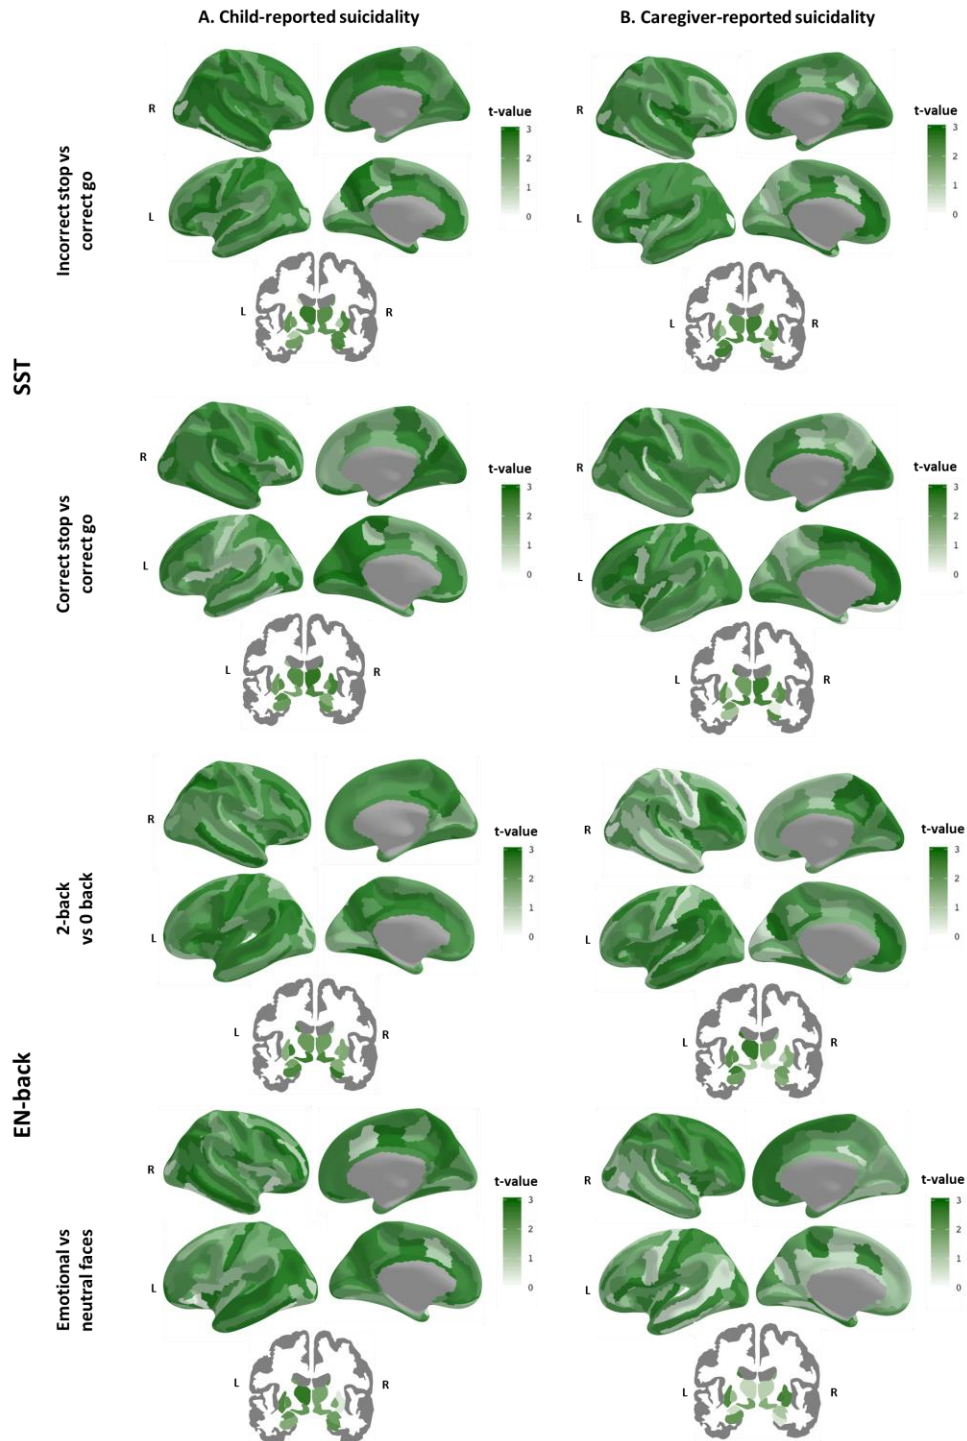

**Figure 6. Equivalence testing for mean differences in functional activation during the SST and EN-back task relating to suicidality.** Distribution of absolute t-values from Equivalence tests comparing the regional means between the never-suicidal group (SST,  $n=4,225$ ; EN-back,  $n=3,994$ ) and the child-reported suicidality group (SST,  $n=368$ ; EN-back,  $n=367$ ) (Panel A) and the caregiver-reported suicidality group (SST,  $n=369$ ; EN-back,  $n=347$ ) (Panel B); Higher t-values (i.e., darker green) suggest equivalence between groups. No statistical differences were found after applying FDR-correction for multiple comparisons.

## Discussion

In a large US population-based sample of school-aged children we found that suicidality endorsement was associated with higher levels of psychopathology and social adversity. However, we found no robust evidence of brain correlates of suicidality using three distinct neuroimaging modalities.

In this sample, we found that suicidality in children manifested mostly as passive or nonspecific suicidal ideation. As expected, the rate of reported suicidal ideation, plans, and attempts was lower than in reports from community samples of adolescents and young adults<sup>19-22,76</sup>; and more in line with rates found in pre-pubertal and school-aged children<sup>77,78</sup>. For example, the rate of suicidal ideation and attempts was 8.9% and 1%, respectively, in a randomly selected sample of children aged 9-10 years<sup>77</sup>. It is important to note that the child and caregiver reports of suicidality were not consistent. A similar observation has been made in adolescents and young adults in whom non-disclosure mainly involved concerns about stigmatization, difficulties in communication and unavailability of social and family support<sup>79</sup>. Regardless of informant, though, suicidality was associated with higher exposure to stressful life events, family conflict, poor school environment, higher psychopathology in children and parents, maternal alcohol and/or substance use during pregnancy, and parental history of depression and suicide attempt or death<sup>14,16,19-25,76</sup>. We also found that females with more advanced pubertal development, but not males, displayed higher rates of suicidality, thus replicating previous findings in community samples of youth<sup>22</sup>.

In contrast to previous reports in clinical samples of adolescents<sup>34-42</sup>, we did not find evidence of consistent or robust associations between suicidality and brain correlates in school-aged children from the community, including measures of regional cortical thickness and subcortical volumes, functional connectivity during rest, and task-based functional activations with contrasts examining reward processing, inhibitory control, working memory, and emotion processing. Very few results were statistically different at uncorrected level, and just one of them, out of 5,184 tests performed, survived correction for multiple comparisons. Specifically, the left bank of the superior temporal sulcus was significantly thinner in the caregiver-reported suicidality group than in the never-suicidal group. We further showed that the majority of group means were equivalent (~67% for child-reported suicidality, ~51% for parent-reported suicidality), and those means that were not statistically equivalent were still not statistically different between the two groups after FDR-correction. The latter are considered undetermined results<sup>50</sup> and would need further replication in other large samples of school-aged children.

The lack of differences between groups in the current study cannot be attributed to a lack of power to detect differences given that size of the sample and the lack of case-control differences that exceeded the small effect size ( $|0.15|$ ) specified in the Equivalence tests. In this respect, our findings are aligned to those reported in the largest meta-analysis to date examining subcortical regions in MDD patients with and without suicidality<sup>27</sup>. It is also unlikely that these results are explained by the instrument used to detect suicidality since the groups endorsing such features displayed all the well-established risk factors. We note, however, that the ABCD study was not specifically designed to assess suicidality and the measures available do not provide information about the frequency and persistence of suicidality. Moreover, very few ABCD participants had

active suicidal thoughts or behaviors at the time of scanning. In this sense, the current investigation would be more accurately described as an attempt to define the neuroimaging correlates of *vulnerability* to suicidality. Another possibility is that the paradigms employed to examine suicidality correlates during MRI in the current study are not suicide-specific such as the Implicit Association Test (IAT)<sup>80</sup>. Nevertheless, our tasks and contrast are designed to capture brain correlates associated with processes that have been linked to suicidality conceptually and empirically. For instance, anhedonia, which is considered the underlying symptom of impaired reward processing, is one of the best predictors of suicide<sup>81,82</sup>. Similarly, deficits in executive functions such as inhibitory control and memory have also been linked to suicidality<sup>83</sup>. It is important to note, though, that these associations have been reported mostly in the context of depressive disorder, and in adult and adolescent samples<sup>81-83</sup>. It is unclear, then, whether this would apply to the general population and younger children.

Based on our results, vulnerability to suicidality in school-age children does not appear to have a “brain signature” that could be used to enhance detection of this vulnerable group. However, this does not imply that suicidality does not have brain correlates but indicates that such associations, if any, are not discernible using macro-level imaging measures at this age. It is plausible that, as brain organization evolves during the adolescent years, these suicidality correlates become more evident, and even more after adolescence. Indeed, not all suicidality correlates found in adults samples have been observed in adolescents samples, and it has been suggested that this is due to differences in brain maturation<sup>8</sup>. Yet, studies examining distinct developmental stages, either cross-sectionally or longitudinally, are needed to answer this question. In that sense, investigation of the longitudinal data from the ABCD cohort when they become available will

likely shed some light to these incongruent findings across samples of different ages. In addition to longitudinal studies, other neuroimaging studies examining suicidality in school-aged children, either in clinical or community-based samples, are needed to certify that “brain signatures” of suicidality are not discernible at these young ages.

In conclusion, we leverage the size of the ABCD cohort to identify multimodal neuroimaging correlates of vulnerability to suicidality in school-age children. We found that risk factors relating to psychopathology and social adversity were present in children endorsing suicidality, but we did not identify a discrete “brain signature” for vulnerability to suicidality. The longitudinal design of the ABCD cohort presents an unprecedented resource for improving our understanding of the evolution of suicidality and its neural correlates during development.

## References

1. WHO. Global Health Observatory (GHO) data. (2018).
2. CDC. Web-based Injury Statistics Query and Reporting System (WISQARS). (National Center for Injury Prevention and Control, Atlanta, GA, 2019).
3. Plemmons, G., *et al.* Hospitalization for Suicide Ideation or Attempt: 2008-2015. *Pediatrics* **141**(2018).
4. Curtin, S.C., Heron, M., Minino, A.M. & Warner, M. Recent Increases in Injury Mortality Among Children and Adolescents Aged 10-19 Years in the United States: 1999-2016. *National vital statistics reports : from the Centers for Disease Control and*

- Prevention, National Center for Health Statistics, National Vital Statistics System* **67**, 1-16 (2018).
5. Pokorny, A.D. Prediction of suicide in psychiatric patients. Report of a prospective study. *Archives of general psychiatry* **40**, 249-257 (1983).
  6. Franklin, J.C., *et al.* Risk factors for suicidal thoughts and behaviors: A meta-analysis of 50 years of research. *Psychological bulletin* **143**, 187-232 (2017).
  7. Belsher, B.E., *et al.* Prediction Models for Suicide Attempts and Deaths: A Systematic Review and Simulation. *JAMA psychiatry* **76**, 642-651 (2019).
  8. Schmaal, L., *et al.* Imaging suicidal thoughts and behaviors: a comprehensive review of 2 decades of neuroimaging studies. *Molecular psychiatry* (In press).
  9. Bolger, N., Downey, G., Walker, E. & Steininger, P. The onset of suicidal ideation in childhood and adolescence. *J Youth Adolesc* **18**, 175-190 (1989).
  10. Kessler, R.C., Borges, G. & Walters, E.E. Prevalence of and risk factors for lifetime suicide attempts in the National Comorbidity Survey. *Archives of general psychiatry* **56**, 617-626 (1999).
  11. Mortier, P., *et al.* The prevalence of suicidal thoughts and behaviours among college students: a meta-analysis. *Psychological medicine* **48**, 554-565 (2018).
  12. Esquirol, J.-É.-D. *Mental Maladies: A Treatise on Insanity*, (Lea and Blanchard, Philadelphia, PA, 1845).
  13. Durkheim, E. *Le suicide: étude de sociologie*, (F. Alcan, Paris, France, 1897).
  14. Turecki, G. & Brent, D.A. Suicide and suicidal behaviour. *Lancet (London, England)* **387**, 1227-1239 (2016).

15. Bridge, J.A., Goldstein, T.R. & Brent, D.A. Adolescent suicide and suicidal behavior. *Journal of child psychology and psychiatry, and allied disciplines* **47**, 372-394 (2006).
16. Soole, R., Kolves, K. & De Leo, D. Suicide in Children: A Systematic Review. *Archives of suicide research : official journal of the International Academy for Suicide Research* **19**, 285-304 (2015).
17. Diekstra, R.F. & Garnefski, N. On the nature, magnitude, and causality of suicidal behaviors: an international perspective. *Suicide & life-threatening behavior* **25**, 36-57 (1995).
18. Rodway, C., *et al.* Suicide in children and young people in England: a consecutive case series. **3**, 751-759 (2016).
19. Nock, M.K., *et al.* Prevalence, correlates, and treatment of lifetime suicidal behavior among adolescents: results from the National Comorbidity Survey Replication Adolescent Supplement. *JAMA psychiatry* **70**, 300-310 (2013).
20. Sampasa-Kanyinga, H., Dupuis, L.C. & Ray, R. Prevalence and correlates of suicidal ideation and attempts among children and adolescents. *International journal of adolescent medicine and health* **29**(2017).
21. Mars, B., *et al.* What distinguishes adolescents with suicidal thoughts from those who have attempted suicide? A population-based birth cohort study. *Journal of child psychology and psychiatry, and allied disciplines* **60**, 91-99 (2019).
22. Barzilay, R., *et al.* Neurocognitive functioning in community youth with suicidal ideation: gender and pubertal effects. *The British journal of psychiatry : the journal of mental science* **215**, 552-558 (2019).



23. Dervic, K., Brent, D.A. & Oquendo, M.A. Completed suicide in childhood. *The Psychiatric clinics of North America* **31**, 271-291 (2008).
24. Roche, A.M., Giner, L. & Zalsman, G. Suicide in early childhood: a brief review. *International journal of adolescent medicine and health* **17**, 221-224 (2005).
25. Tishler, C.L., Reiss, N.S. & Rhodes, A.R. Suicidal behavior in children younger than twelve: a diagnostic challenge for emergency department personnel. *Academic emergency medicine : official journal of the Society for Academic Emergency Medicine* **14**, 810-818 (2007).
26. Jollant, F., *et al.* Neuroimaging-informed phenotypes of suicidal behavior: a family history of suicide and the use of a violent suicidal means. *Translational psychiatry* **8**, 120 (2018).
27. Rentería, M.E., *et al.* Subcortical brain structure and suicidal behaviour in major depressive disorder: a meta-analysis from the ENIGMA-MDD working group. *Translational psychiatry* **7**, e11116 (2017).
28. Bani-Fatemi, A., *et al.* Structural and functional alterations of the suicidal brain: An updated review of neuroimaging studies. *Psychiatry research. Neuroimaging* **278**, 77-91 (2018).
29. Desmyter, S., van Heeringen, C. & Audenaert, K. Structural and functional neuroimaging studies of the suicidal brain. *Progress in neuro-psychopharmacology & biological psychiatry* **35**, 796-808 (2011).
30. van Heeringen, C., Bijttebier, S. & Godfrin, K. Suicidal brains: a review of functional and structural brain studies in association with suicidal behaviour. *Neuroscience and biobehavioral reviews* **35**, 688-698 (2011).



31. van Heeringen, K., Bijttebier, S., Desmyter, S., Vervaet, M. & Baeken, C. Is there a neuroanatomical basis of the vulnerability to suicidal behavior? A coordinate-based meta-analysis of structural and functional MRI studies. *Frontiers in human neuroscience* **8**, 824 (2014).
32. Dominguez-Baleon, C., Gutierrez-Mondragon, L.F., Campos-Gonzalez, A.I. & Renteria, M.E. Neuroimaging Studies of Suicidal Behavior and Non-suicidal Self-Injury in Psychiatric Patients: A Systematic Review. *Frontiers in psychiatry* **9**, 500 (2018).
33. Stange, J.P., *et al.* Using resting-state intrinsic network connectivity to identify suicide risk in mood disorders. *Psychological medicine*, 1-11 (2019).
34. Miller, A.B., *et al.* Neural Correlates of Emotion Regulation and Adolescent Suicidal Ideation. *Biological psychiatry : cognitive neuroscience and neuroimaging* **3**, 125-132 (2018).
35. Ordaz, S.J., Goyer, M.S., Ho, T.C., Singh, M.K. & Gotlib, I.H. Network basis of suicidal ideation in depressed adolescents. *Journal of affective disorders* **226**, 92-99 (2018).
36. Pan, L., *et al.* Preserved hippocampal function during learning in the context of risk in adolescent suicide attempt. *Psychiatry research* **211**, 112-118 (2013).
37. Pan, L.A., *et al.* Dissociable patterns of neural activity during response inhibition in depressed adolescents with and without suicidal behavior. *Journal of the American Academy of Child and Adolescent Psychiatry* **50**, 602-611.e603 (2011).
38. Pan, L.A., *et al.* Differential patterns of activity and functional connectivity in emotion processing neural circuitry to angry and happy faces in adolescents with and without suicide attempt. *Psychological medicine* **43**, 2129-2142 (2013).

39. Schwartz, J., Ordaz, S.J., Ho, T.C. & Gotlib, I.H. Longitudinal decreases in suicidal ideation are associated with increases in salience network coherence in depressed adolescents. *Journal of affective disorders* **245**, 545-552 (2019).
40. Johnston, J.A.Y., *et al.* Multimodal Neuroimaging of Frontolimbic Structure and Function Associated With Suicide Attempts in Adolescents and Young Adults With Bipolar Disorder. *The American journal of psychiatry* **174**, 667-675 (2017).
41. Marchand, W.R., *et al.* Striatal and cortical midline circuits in major depression: implications for suicide and symptom expression. *Progress in neuro-psychopharmacology & biological psychiatry* **36**, 290-299 (2012).
42. Ehrlich, S., *et al.* White matter hyperintensities and their associations with suicidality in psychiatrically hospitalized children and adolescents. *Journal of the American Academy of Child and Adolescent Psychiatry* **43**, 770-776 (2004).
43. Casey, B.J., *et al.* The Adolescent Brain Cognitive Development (ABCD) study: Imaging acquisition across 21 sites. *Developmental cognitive neuroscience* **32**, 43-54 (2018).
44. Garavan, H., *et al.* Recruiting the ABCD sample: Design considerations and procedures. *Developmental cognitive neuroscience* **32**, 16-22 (2018).
45. Tsypes, A., Owens, M., Hajcak, G. & Gibb, B.E. Neural responses to gains and losses in children of suicide attempters. *Journal of abnormal psychology* **126**, 237-243 (2017).
46. Jollant, F., *et al.* Decreased activation of lateral orbitofrontal cortex during risky choices under uncertainty is associated with disadvantageous decision-making and suicidal behavior. *NeuroImage* **51**, 1275-1281 (2010).

47. McHugh, C.M., *et al.* Impulsivity in the self-harm and suicidal behavior of young people: A systematic review and meta-analysis. *Journal of psychiatric research* **116**, 51-60 (2019).
48. Bomyea, J., Stout, D.M. & Simmons, A.N. Attenuated prefrontal and temporal neural activity during working memory as a potential biomarker of suicidal ideation in veterans with PTSD. *Journal of affective disorders* **257**, 607-614 (2019).
49. Bauer, B.W., Gustafsson, H.C., Nigg, J. & Karalunas, S.L. Working memory mediates increased negative affect and suicidal ideation in childhood attention-deficit/hyperactivity disorder. *J Psychopathol Behav Assess* **40**, 180-193 (2018).
50. Lakens, D. Equivalence Tests: A Practical Primer for t Tests, Correlations, and Meta-Analyses. *Social psychological and personality science* **8**, 355-362 (2017).
51. Kobak, K., Kratochvil, C., Stanger, C. & Kaufman, J. Computerized screening of comorbidity in adolescents with substance or psychiatric disorders. in *Poster presented at the 33rd annual anxiety disorders and depression conference, La Jolla, CA. Retrieved from [http://www.telepsychology.net/resources/KSADS\\_ADAAPosterv4.pdf](http://www.telepsychology.net/resources/KSADS_ADAAPosterv4.pdf)* (2013).
52. Hagler, D.J., Jr., *et al.* Image processing and analysis methods for the Adolescent Brain Cognitive Development Study. *NeuroImage*, 116091 (2019).
53. Gordon, E.M., *et al.* Generation and Evaluation of a Cortical Area Parcellation from Resting-State Correlations. *Cereb Cortex* **26**, 288-303 (2016).
54. Van Dijk, K.R., *et al.* Intrinsic functional connectivity as a tool for human connectomics: theory, properties, and optimization. *Journal of neurophysiology* **103**, 297-321 (2010).
55. Seibert, T.M. & Brewer, J.B. Default network correlations analyzed on native surfaces. *Journal of neuroscience methods* **198**, 301-311 (2011).

56. Knutson, B., Westdorp, A., Kaiser, E. & Hommer, D. FMRI visualization of brain activity during a monetary incentive delay task. *NeuroImage* **12**, 20-27 (2000).
57. Logan, G.D. On the ability to inhibit thought and action: A users' guide to the stop signal paradigm. in *Inhibitory processes in attention, memory, and language*. 189-239 (Academic Press, San Diego, CA, US, 1994).
58. Cohen, A., Conley, M., Dellarco, D. & Casey, B.J.P.o.t.S.f.N.S.D., CA. November. The impact of emotional cues on short-term and long-term memory during adolescence. (2016).
59. Cohen, A.O., *et al.* When Is an Adolescent an Adult? Assessing Cognitive Control in Emotional and Nonemotional Contexts. **27**, 549-562 (2016).
60. Jollant, F., *et al.* Orbitofrontal cortex response to angry faces in men with histories of suicide attempts. *The American journal of psychiatry* **165**, 740-748 (2008).
61. Vanyukov, P.M., *et al.* Paralimbic and lateral prefrontal encoding of reward value during intertemporal choice in attempted suicide. *Psychological medicine* **46**, 381-391 (2016).
62. Xie, W., *et al.* Anhedonia and pain avoidance in the suicidal mind: behavioral evidence for motivational manifestations of suicidal ideation in patients with major depressive disorder. *Journal of clinical psychology* **70**, 681-692 (2014).
63. Seymour, K.E., *et al.* Emotional face recognition in adolescent suicide attempters and adolescents engaging in non-suicidal self-injury. *European child & adolescent psychiatry* **25**, 247-259 (2016).
64. Cox, R.W. AFNI: software for analysis and visualization of functional magnetic resonance neuroimages. *Computers and biomedical research, an international journal* **29**, 162-173 (1996).

65. Destrieux, C., Fischl, B., Dale, A. & Halgren, E. Automatic parcellation of human cortical gyri and sulci using standard anatomical nomenclature. *NeuroImage* **53**, 1-15 (2010).
66. Fischl, B., *et al.* Whole brain segmentation: automated labeling of neuroanatomical structures in the human brain. *Neuron* **33**, 341-355 (2002).
67. Pornpattananangkul, N., Leibenluft, E., Pine, D.S. & Stringaris, A. Mapping Anhedonia in Youth: Large-Scale Resting-State Network, Task-Evoked Activation and Phenotypic Demarcation. *JAMA psychiatry* (2019).
68. Fortin, J.P., *et al.* Harmonization of multi-site diffusion tensor imaging data. *NeuroImage* **161**, 149-170 (2017).
69. Nielson, D.M., *et al.* Detecting and harmonizing scanner differences in the ABCD study - annual release 1.0. (2018).
70. Welch, B.L. The generalisation of student's problems when several different population variances are involved. *Biometrika* **34**, 28-35 (1947).
71. Dick, A.S., *et al.* No evidence for a bilingual executive function advantage in the nationally representative ABCD study. *Nature human behaviour* **3**, 692-701 (2019).
72. Ialongo, C. The logic of equivalence testing and its use in laboratory medicine. *Biochemia medica* **27**, 5-13 (2017).
73. Schuirmann, D.J. A comparison of the two one-sided tests procedure and the power approach for assessing the equivalence of average bioavailability. *Journal of pharmacokinetics and biopharmaceutics* **15**, 657-680 (1987).
74. Cohen, J. *Statistical power analysis for the behavioral sciences*, (Erlbaum, Hillsdale, NJ, 1988).

75. Lakens, D., McLatchie, N., Isager, P.M., Scheel, A.M. & Dienes, Z. Improving Inferences about Null Effects with Bayes Factors and Equivalence Tests. *The journals of gerontology. Series B, Psychological sciences and social sciences* (2018).
76. Mars, B., *et al.* Predictors of future suicide attempt among adolescents with suicidal thoughts or non-suicidal self-harm: a population-based birth cohort study. *The lancet. Psychiatry* **6**, 327-337 (2019).
77. Pfeffer, C.R., Zuckerman, S., Plutchik, R. & Mizruchi, M.S. Suicidal behavior in normal school children: a comparison with child psychiatric inpatients. *Journal of the American Academy of Child Psychiatry* **23**, 416-423 (1984).
78. Gould, M.S., *et al.* Psychopathology associated with suicidal ideation and attempts among children and adolescents. *Journal of the American Academy of Child and Adolescent Psychiatry* **37**, 915-923 (1998).
79. Levi-Belz, Y., *et al.* Psychosocial Factors Correlated with Undisclosed Suicide Attempts to Significant Others: Findings from the Adolescence SEYLE Study. *Suicide & life-threatening behavior* **49**, 759-773 (2019).
80. Nock, M.K., *et al.* Measuring the suicidal mind: implicit cognition predicts suicidal behavior. *Psychol Sci* **21**, 511-517 (2010).
81. Fawcett, J., *et al.* Time-related predictors of suicide in major affective disorder. *The American journal of psychiatry* **147**, 1189-1194 (1990).
82. Nock, M.K. & Kazdin, A.E. Examination of affective, cognitive, and behavioral factors and suicide-related outcomes in children and young adolescents. *Journal of clinical child and adolescent psychology : the official journal for the Society of Clinical Child and*

*Adolescent Psychology, American Psychological Association, Division 53* **31**, 48-58

(2002).

83. Bredemeier, K. & Miller, I.W. Executive function and suicidality: A systematic qualitative review. *Clinical psychology review* **40**, 170-183 (2015).
